# Supplementary material for: Mechanochemical extraction of edible proteins from moor grass
Source: Royal Society of Chemistry journal article supplement (doi:10.1039/d4mr00016a), 2024-01-01
Supplement: d4mr00016a1.pdf [file d4mr00016a1.pdf]

## Mechanochemical Extraction of Edible Proteins from Moor Grass

*Olusegun Abayomi Olalere,<sup>1,2</sup> Fatma Guler,<sup>1</sup> Christopher J. Chuck,<sup>1,3</sup> Hannah S. Leese,<sup>1,3</sup> Bernardo Castro-Dominguez<sup>1,2</sup>*

<sup>1</sup> *Department of Chemical Engineering, University of Bath, Claverton Down, BA2 7AY, Bath, United Kingdom*

<sup>2</sup> *Centre for Digital Manufacturing and Design (dMaDe), University of Bath, Bath BA2 7AY, United Kingdom.*

<sup>3</sup> *Centre for Bioengineering and Biomedical Technologies (CBio), University of Bath, Bath BA2 7AY, United Kingdom.*

### Supplementary Information

#### **4 Tables, 3 Figures**

Table S1: Independent variables and their levels in the orthogonal design

Table S2: Taguchi orthogonal experimental L<sub>27</sub> (3<sup>5</sup>) design with the response

Table S3: Response table of mean analysis

Table S4: Summary of microscopic interparticle distance in the AEM residue

Table S5: Summary of microscopic interparticle distance in the LAG residue

Table S6: Summary of microscopic interparticle distance in the SAG residue

Fig S1: Graphical representation of SAG optimal endpoint

Fig S2: Interaction parameters under three-level settings

Fig S3: Image analysis of grass residues for AE, LAG and SAG

**Table S1:** Independent variables and their levels in the orthogonal design

| Independent variables           | Levels           |                |               |
|---------------------------------|------------------|----------------|---------------|
|                                 | -1               | 0              | 1             |
| Milling duration (min)          | 10               | 20             | 30            |
| Milling speed (rpm)             | 200              | 400            | 600           |
| Solid agent (%)                 | 5 or<br>0.05g/mL | 15 or 0.15g/mL | 20 or 0.2g/mL |
| Grass-to-solvent<br>(mg/mL)     | 10               | 20             | 30            |
| Particle size ( $\mu\text{m}$ ) | $\leq 125$       | $> 250$        | $> 355$       |

**Table S2:** Taguchi orthogonal experimental  $L_{27}$  ( $3^5$ ) design with the response

| Independent variables        |                           |                       |                                 |                                    | Protein<br>Fraction<br>Yield (%) | Signal-to-<br>noise ratio |
|------------------------------|---------------------------|-----------------------|---------------------------------|------------------------------------|----------------------------------|---------------------------|
| Milling<br>duration<br>(min) | Milling<br>speed<br>(rpm) | Solid<br>agent<br>(%) | Grass-to-<br>solvent<br>(mg/mL) | Particle<br>size ( $\mu\text{m}$ ) |                                  |                           |
| 1                            | 1                         | 1                     | 1                               | 1                                  | 9.10                             | 19.1763                   |
| 1                            | 1                         | 2                     | 2                               | 2                                  | 11.74                            | 21.3928                   |
| 1                            | 1                         | 3                     | 3                               | 3                                  | 7.89                             | 17.9368                   |
| 1                            | 2                         | 1                     | 2                               | 3                                  | 7.26                             | 17.2153                   |
| 1                            | 2                         | 2                     | 3                               | 1                                  | 11.74                            | 21.3955                   |
| 1                            | 2                         | 3                     | 1                               | 2                                  | 3.43                             | 10.7023                   |
| 1                            | 3                         | 1                     | 3                               | 2                                  | 13.54                            | 22.6342                   |
| 1                            | 3                         | 2                     | 1                               | 3                                  | 4.29                             | 12.6405                   |
| 1                            | 3                         | 3                     | 2                               | 1                                  | 10.88                            | 20.7295                   |
| 2                            | 1                         | 1                     | 1                               | 1                                  | 6.68                             | 16.4906                   |
| 2                            | 1                         | 2                     | 2                               | 2                                  | 8.11                             | 18.1850                   |
| 2                            | 1                         | 3                     | 3                               | 3                                  | 8.91                             | 19.0017                   |
| 2                            | 2                         | 1                     | 2                               | 3                                  | 6.91                             | 16.7949                   |
| 2                            | 2                         | 2                     | 3                               | 1                                  | 8.77                             | 18.8614                   |
| 2                            | 2                         | 3                     | 1                               | 2                                  | 4.29                             | 12.6405                   |
| 2                            | 3                         | 1                     | 3                               | 2                                  | 8.34                             | 18.4263                   |
| 2                            | 3                         | 2                     | 1                               | 3                                  | 3.29                             | 10.3326                   |
| 2                            | 3                         | 3                     | 2                               | 1                                  | 8.50                             | 18.5835                   |
| 3                            | 1                         | 1                     | 1                               | 1                                  | 8.98                             | 19.0664                   |
| 3                            | 1                         | 2                     | 2                               | 2                                  | 8.97                             | 19.0572                   |
| 3                            | 1                         | 3                     | 3                               | 3                                  | 9.74                             | 19.7737                   |
| 3                            | 2                         | 1                     | 2                               | 3                                  | 7.52                             | 17.5288                   |
| 3                            | 2                         | 2                     | 3                               | 1                                  | 7.97                             | 18.0307                   |
| 3                            | 2                         | 3                     | 1                               | 2                                  | 3.50                             | 10.8932                   |
| 3                            | 3                         | 1                     | 3                               | 2                                  | 20.10                            | 25.1878                   |
| 3                            | 3                         | 2                     | 1                               | 3                                  | 5.19                             | 14.3041                   |
| 3                            | 3                         | 3                     | 2                               | 1                                  | 10.51                            | 20.4356                   |

**Table S3:** Response table of mean analysis

| Level                                                 | Milling duration (min) | Milling speed (rpm) | Solid agent (%) | Grass-solvent (mg/mL) | Particle size ( $\mu\text{m}$ ) |
|-------------------------------------------------------|------------------------|---------------------|-----------------|-----------------------|---------------------------------|
| $\beta_1$                                             | 8.873                  | 8.902               | 9.612           | 5.415                 | 9.236                           |
| $\beta_2$                                             | 7.089                  | 6.822               | 7.786           | 8.934                 | 8.900                           |
| $\beta_3$                                             | 8.952                  | 9.189               | 7.516           | 10.565                | 6.778                           |
| Delta ( $\beta_{\text{max}}$ - $\beta_{\text{min}}$ ) | 1.863                  | 2.367               | 2.095           | 5.150                 | 2.458                           |
| Rank                                                  | 5 <sup>th</sup>        | 3 <sup>rd</sup>     | 4 <sup>th</sup> | 1 <sup>st</sup>       | 2 <sup>nd</sup>                 |

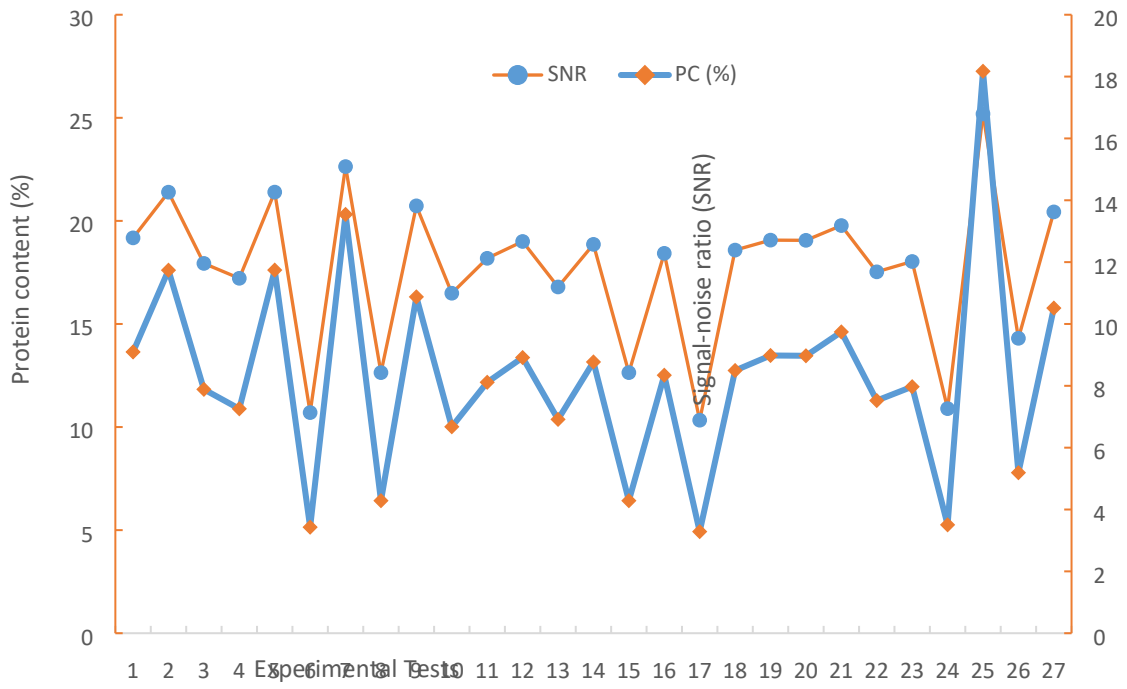

**Fig.S1.** Graphical representation of SAG optimal endpoint

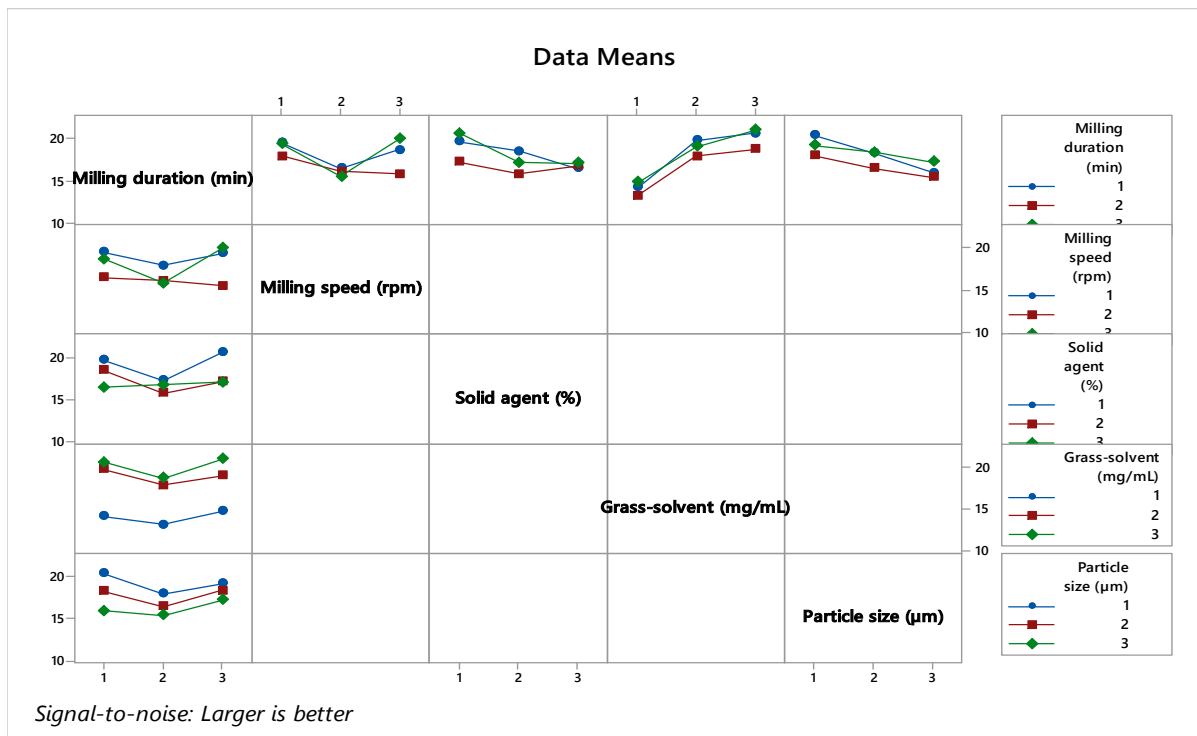

**Fig S2.** Interaction parameters under three-level settings

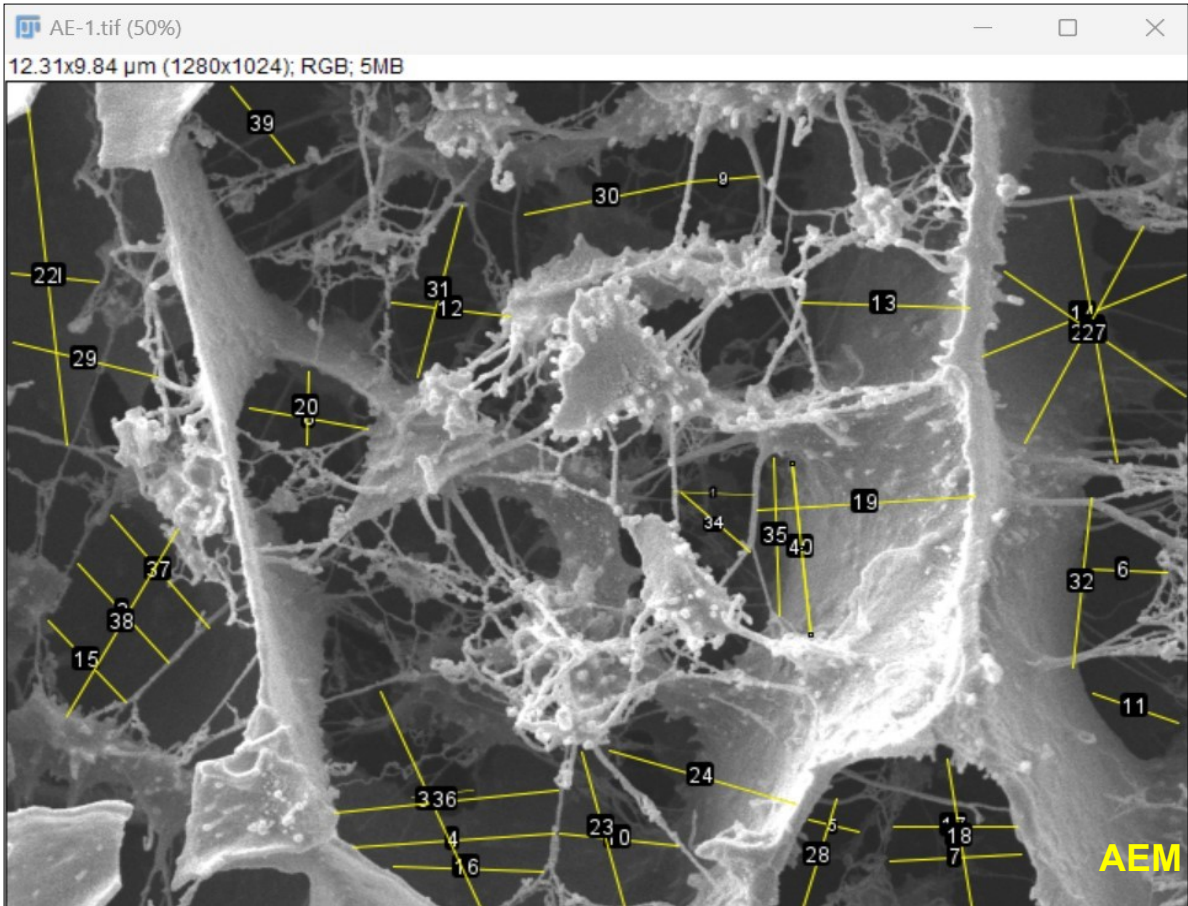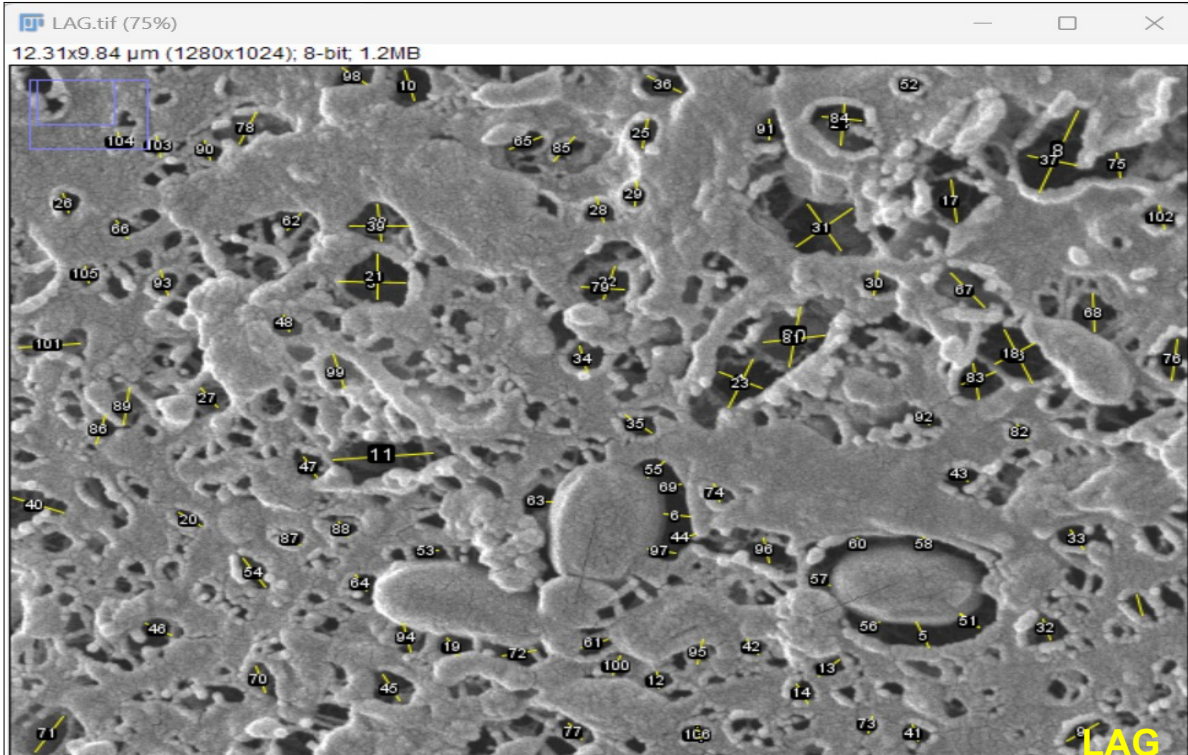

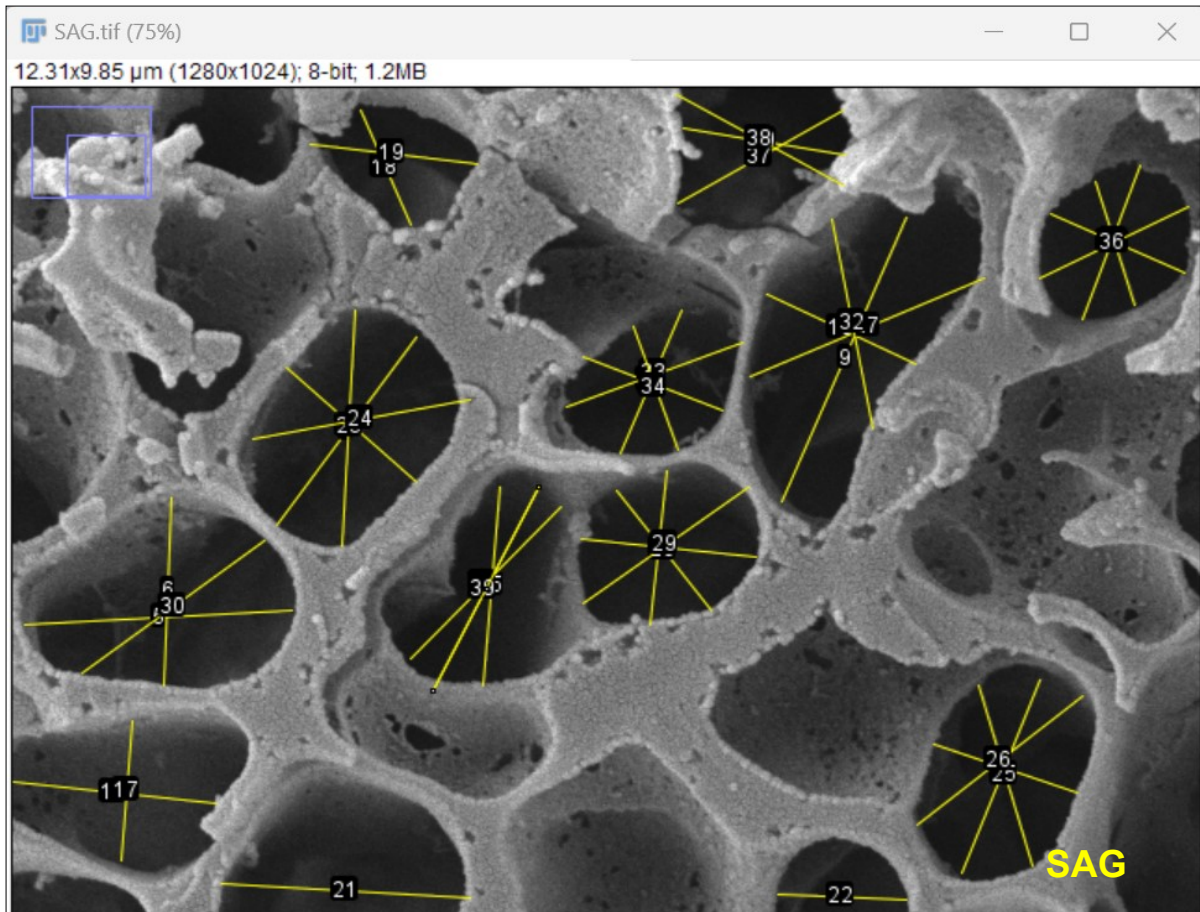

**Figure S3:** Image analysis of grass residues for AE, LAG and SAG

**Table S4:** Summary of microscopic interparticle distance in the AEM residue

| Perim. | Feret | FeretX | FeretY | FeretAngle | Length |
|--------|-------|--------|--------|------------|--------|
| 1.45   | 1.45  | 76     | 556    | 130.68     | 1.45   |
| 2.1    | 2.1   | 374    | 884    | 4.2        | 2.1    |
| 1.37   | 1.37  | 956    | 900    | 3.22       | 1.37   |
| 1.25   | 1.25  | 262    | 376    | 169.38     | 1.25   |
| 0.71   | 0.71  | 740    | 114    | 4.64       | 0.71   |
| 1.24   | 1.24  | 598    | 868    | 173.76     | 1.24   |
| 1.24   | 1.24  | 416    | 254    | 172.87     | 1.24   |
| 1.75   | 1.75  | 860    | 254    | 178.11     | 1.75   |
| 2.3    | 2.3   | 1056   | 316    | 23.14      | 2.3    |
| 1.21   | 1.21  | 44     | 622    | 131.78     | 1.21   |
| 1.56   | 1.56  | 418    | 906    | 177.88     | 1.56   |
| 1.29   | 1.29  | 960    | 860    | 0          | 1.29   |
| 1.77   | 1.77  | 1018   | 782    | 98.75      | 1.77   |
| 2.27   | 2.27  | 812    | 494    | 3.88       | 2.27   |
| 3.75   | 3.75  | 22     | 30     | 96.18      | 3.75   |
| 1.77   | 1.77  | 622    | 774    | 104.49     | 1.77   |
| 2.03   | 2.03  | 652    | 772    | 162.94     | 2.03   |
| 2.98   | 2.98  | 1152   | 132    | 99.28      | 2.98   |
| 2.7    | 2.7   | 1102   | 416    | 62.89      | 2.7    |
| 2.34   | 2.34  | 1080   | 218    | 143.7      | 2.34   |

|                                      |      |      |     |        |          |
|--------------------------------------|------|------|-----|--------|----------|
| 1.32                                 | 1.32 | 860  | 960 | 73.94  | 1.32     |
| 1.55                                 | 1.55 | 6    | 300 | 165.62 | 1.55     |
| 1.77                                 | 1.77 | 560  | 152 | 11.92  | 1.77     |
| 1.96                                 | 1.96 | 444  | 340 | 76.37  | 1.96     |
| 1.89                                 | 1.89 | 1154 | 676 | 84.17  | 1.89     |
| 2.66                                 | 2.66 | 404  | 704 | 113.42 | 2.66     |
| 1.75                                 | 1.75 | 830  | 434 | 91.89  | 1.75     |
| 2.34                                 | 2.34 | 354  | 844 | 6.13   | 2.34     |
| 1.61                                 | 1.61 | 112  | 500 | 129.19 | 1.61     |
| 2.38                                 | 2.38 | 64   | 732 | 60.95  | 2.38     |
| 1.07                                 | 1.07 | 242  | 4   | 127.69 | 1.07     |
| 1.91                                 | 1.91 | 850  | 440 | 95.77  | 1.91     |
| Average Interparticle Distance (AEM) |      |      |     |        | 1.85±0.6 |

**Table S5:** Summary of microscopic interparticle distance in the LAG residue

| Perim. | Feret | FeretX | FeretY | FeretAngle | Length |
|--------|-------|--------|--------|------------|--------|
| 0.33   | 0.33  | 603    | 301    | 151.93     | 0.33   |
| 0.27   | 0.27  | 745    | 548    | 111.04     | 0.27   |
| 0.18   | 0.18  | 562    | 442    | 173.99     | 0.18   |
| 0.5    | 0.5   | 667    | 136    | 117.55     | 0.5    |
| 0.27   | 0.27  | 855    | 665    | 37.69      | 0.27   |
| 0.3    | 0.3   | 374    | 4      | 103.13     | 0.3    |
| 0.15   | 0.15  | 557    | 598    | 93.58      | 0.15   |
| 0.2    | 0.2   | 674    | 601    | 45         | 0.2    |
| 0.2    | 0.2   | 659    | 609    | 112.83     | 0.2    |
| 0.34   | 0.34  | 786    | 293    | 96.52      | 0.34   |
| 0.33   | 0.33  | 802    | 293    | 34.16      | 0.33   |
| 0.18   | 0.18  | 405    | 564    | 115.2      | 0.18   |
| 0.19   | 0.19  | 211    | 440    | 139.09     | 0.19   |
| 0.43   | 0.43  | 354    | 185    | 90         | 0.43   |
| 0.18   | 0.18  | 127    | 126    | 99.46      | 0.18   |
| 0.2    | 0.2   | 227    | 318    | 121.43     | 0.2    |
| 0.23   | 0.23  | 513    | 130    | 102.26     | 0.23   |
| 0.23   | 0.23  | 541    | 138    | 87.61      | 0.23   |
| 0.22   | 0.22  | 715    | 225    | 85.03      | 0.22   |
| 0.54   | 0.54  | 658    | 178    | 42.83      | 0.54   |
| 0.2    | 0.2   | 837    | 545    | 104.04     | 0.2    |
| 0.21   | 0.21  | 857    | 457    | 117.76     | 0.21   |
| 0.25   | 0.25  | 501    | 276    | 101.31     | 0.25   |
| 0.25   | 0.25  | 534    | 344    | 138.18     | 0.25   |
| 0.27   | 0.27  | 551    | 10     | 145.18     | 0.27   |
| 0.37   | 0.37  | 90     | 426    | 158.75     | 0.37   |
| 0.15   | 0.15  | 743    | 650    | 104.93     | 0.15   |
| 0.15   | 0.15  | 623    | 566    | 116.57     | 0.15   |
| 0.14   | 0.14  | 773    | 397    | 126.87     | 0.14   |
| 0.19   | 0.19  | 566    | 468    | 17.53      | 0.19   |
| 0.28   | 0.28  | 359    | 600    | 114.78     | 0.28   |
| 0.21   | 0.21  | 187    | 550    | 146.31     | 0.21   |

|      |      |     |     |        |      |
|------|------|-----|-----|--------|------|
| 0.22 | 0.22 | 301 | 385 | 113.2  | 0.22 |
| 0.17 | 0.17 | 286 | 245 | 106.39 | 0.17 |
| 0.18 | 0.18 | 777 | 540 | 137.12 | 0.18 |
| 0.18 | 0.18 | 777 | 540 | 137.12 | 0.18 |
| 0.18 | 0.18 | 777 | 540 | 137.12 | 0.18 |
| 0.11 | 0.11 | 737 | 14  | 135    | 0.11 |
| 0.15 | 0.15 | 383 | 478 | 0      | 0.15 |
| 0.31 | 0.31 | 257 | 486 | 119.74 | 0.31 |
| 0.18 | 0.18 | 551 | 405 | 53.75  | 0.18 |
| 0.15 | 0.15 | 705 | 557 | 34.7   | 0.15 |
| 0.17 | 0.17 | 669 | 501 | 141.84 | 0.17 |
| 0.13 | 0.13 | 750 | 464 | 111.04 | 0.13 |
| 0.12 | 0.12 | 703 | 466 | 108.43 | 0.12 |
| 0.12 | 0.12 | 703 | 466 | 108.43 | 0.12 |
| 0.19 | 0.19 | 503 | 574 | 26.57  | 0.19 |
| 0.18 | 0.18 | 289 | 161 | 60.64  | 0.18 |
| 0.18 | 0.18 | 462 | 429 | 0      | 0.18 |
| 0.17 | 0.17 | 339 | 502 | 116.57 | 0.17 |
| 0.25 | 0.25 | 450 | 81  | 27.55  | 0.25 |
| 0.18 | 0.18 | 165 | 152 | 115.2  | 0.18 |
| 0.4  | 0.4  | 770 | 204 | 127.15 | 0.4  |
| 0.37 | 0.37 | 873 | 224 | 93.01  | 0.37 |
| 0.16 | 0.16 | 559 | 418 | 21.8   | 0.16 |
| 0.25 | 0.25 | 267 | 592 | 103.5  | 0.25 |
| 0.39 | 0.39 | 106 | 676 | 59.04  | 0.39 |
| 0.24 | 0.24 | 445 | 582 | 14.04  | 0.24 |
| 0.16 | 0.16 | 710 | 657 | 79.38  | 0.16 |
| 0.17 | 0.17 | 598 | 412 | 106.39 | 0.17 |
| 0.24 | 0.24 | 891 | 85  | 94.57  | 0.24 |
| 0.15 | 0.15 | 819 | 354 | 113.2  | 0.15 |
| 0.27 | 0.27 | 778 | 314 | 25.64  | 0.27 |
| 0.27 | 0.27 | 677 | 50  | 173.88 | 0.27 |
| 0.28 | 0.28 | 483 | 94  | 60.75  | 0.28 |
| 0.28 | 0.28 | 151 | 372 | 77.91  | 0.28 |
| 0.16 | 0.16 | 286 | 461 | 139.76 | 0.16 |
| 0.15 | 0.15 | 327 | 450 | 113.2  | 0.15 |
| 0.34 | 0.34 | 170 | 353 | 83.48  | 0.34 |
| 0.19 | 0.19 | 229 | 73  | 101.89 | 0.19 |
| 0.19 | 0.19 | 638 | 52  | 90     | 0.19 |
| 0.12 | 0.12 | 749 | 341 | 112.62 | 0.12 |
| 0.23 | 0.23 | 197 | 202 | 102.26 | 0.23 |
| 0.28 | 0.28 | 373 | 550 | 102.09 | 0.28 |
| 0.23 | 0.23 | 587 | 590 | 82.87  | 0.23 |
| 0.23 | 0.23 | 635 | 465 | 97.13  | 0.23 |
| 0.21 | 0.21 | 550 | 476 | 169.22 | 0.21 |
| 0.22 | 0.22 | 329 | 2   | 136.74 | 0.22 |
| 0.34 | 0.34 | 322 | 284 | 103.24 | 0.34 |
| 0.18 | 0.18 | 525 | 600 | 74.48  | 0.18 |



|                                      |      |     |     |        |           |
|--------------------------------------|------|-----|-----|--------|-----------|
| 0.21                                 | 0.21 | 921 | 138 | 100.3  | 0.21      |
| 0.19                                 | 0.19 | 195 | 69  | 95.71  | 0.19      |
| 0.16                                 | 0.16 | 167 | 66  | 97.13  | 0.16      |
| 0.17                                 | 0.17 | 142 | 197 | 100.01 | 0.17      |
| 0.13                                 | 0.13 | 586 | 652 | 102.99 | 0.13      |
| Average Interparticle Distance (LAG) |      |     |     |        | 0.23 ±0.1 |

**Table S6:** Summary of microscopic interparticle distance in the SAG residue

| Perim.                               | Feret | FeretX | FeretY | FeretAngle | Length   |
|--------------------------------------|-------|--------|--------|------------|----------|
| 1.21                                 | 1.21  | 801    | 677    | 173.61     | 1.21     |
| 1.1                                  | 1.1   | 850    | 741    | 83.49      | 1.1      |
| 1.23                                 | 1.23  | 589    | 549    | 137.54     | 1.23     |
| 1.65                                 | 1.65  | 583    | 666    | 54.27      | 1.65     |
| 1.85                                 | 1.85  | 401    | 741    | 2.98       | 1.85     |
| 1.35                                 | 1.35  | 501    | 787    | 87.55      | 1.35     |
| 1.5                                  | 1.5   | 1074   | 927    | 68.54      | 1.5      |
| 1.05                                 | 1.05  | 1054   | 830    | 160.24     | 1.05     |
| 2.21                                 | 2.21  | 945    | 649    | 67         | 2.21     |
| 1.13                                 | 1.13  | 935    | 495    | 154.31     | 1.13     |
| 1.11                                 | 1.11  | 829    | 613    | 67.65      | 1.11     |
| 1.03                                 | 1.03  | 803    | 541    | 158        | 1.03     |
| 1.16                                 | 1.16  | 1161   | 513    | 70.22      | 1.16     |
| 1.01                                 | 1.01  | 1138   | 435    | 155.87     | 1.01     |
| 1.44                                 | 1.44  | 731    | 787    | 85.4       | 1.44     |
| 1.4                                  | 1.4   | 393    | 859    | 173.7      | 1.4      |
| 1.17                                 | 1.17  | 606    | 382    | 172.93     | 1.17     |
| 1.12                                 | 1.12  | 875    | 371    | 170.62     | 1.12     |
| 1.71                                 | 1.71  | 543    | 935    | 176.78     | 1.71     |
| 1.7                                  | 1.7   | 629    | 683    | 86.77      | 1.7      |
| 1.53                                 | 1.53  | 565    | 603    | 10.89      | 1.53     |
| 1.35                                 | 1.35  | 1087   | 786    | 105.72     | 1.35     |
| 1.47                                 | 1.47  | 1042   | 891    | 38.89      | 1.47     |
| 1.75                                 | 1.75  | 923    | 556    | 23.61      | 1.75     |
| 1.07                                 | 1.07  | 827    | 641    | 126.97     | 1.07     |
| 1.4                                  | 1.4   | 803    | 725    | 36.09      | 1.4      |
| 1.57                                 | 1.57  | 443    | 777    | 37.01      | 1.57     |
| 1.51                                 | 1.51  | 678    | 767    | 46.55      | 1.51     |
| 1.52                                 | 1.52  | 981    | 439    | 100.6      | 1.52     |
| 1.3                                  | 1.3   | 791    | 579    | 21.25      | 1.3      |
| 1.15                                 | 1.15  | 1130   | 483    | 26.78      | 1.15     |
| 1.33                                 | 1.33  | 870    | 427    | 30.47      | 1.33     |
| 1.33                                 | 1.33  | 869    | 345    | 150.46     | 1.33     |
| 1.63                                 | 1.63  | 694    | 790    | 63.28      | 1.63     |
| Average Interparticle Distance (SAG) |       |        |        |            | 1.38±0.3 |
